# Supplementary material
Source: ML conference proceedings conference paper supplement (https://openreview.net/forum?id=wucw3dPxkL)
Supplement: supplementary_material [file attachment]

# Supplementary Experiments for CLIP-Adapter and PLOT

Anonymous Authors

## 1 SUPPLEMENTARY EXPERIMENTS

### 1.1 The difference between Ours and PLOT

We will briefly describe the difference between our method and PLOT.

**Different Designs:** In contrast to PLOT, we obtain a global text feature for **textual one prompt**, instead of a local text feature with **textual multi-prompt input**. The multi-prompt is that the set of learnable prompt is 4 ( $N = 4$ ) and the set of output text feature is 4. The model optimizes four sentences simultaneously ("a photo of a dog", "a picture of a dog", "a drawing of a dog", "a good drawing of a dog"). Each embedding in each sentence participates in learning. The output text feature of our method is global feature ( $N = 1$ ), the input sentence is **one text prompt** such as "a photo of a", and the text prompt is **non-learnable**. Our method is more simpler than **text multi-prompt input method (PLOT)** in textual design component. Further, the core component of PLOT is **OT**, while the core component of our method is **EnLa**. Our approach focuses on the proposal of EnLa and frozen text prompt, which is different with the design proposal of PLOT.

**Different problems:** Our approach primarily addresses **generalization issues**, such as base-to-novel and cross-data transfer experiments. In contrast, PLOT mainly focuses on **few-shot learning experiments** that tackle supervised tasks. However, our method also excels in few-shot learning experiments. As a result, the problems we aim to solve using optimal transport are **entirely distinct** from those addressed by PLOT.

### 1.2 End-to-end OT

The transport plan is efficiently computed through a limited number of matrix multiplications as a forward module. These matrix multiplications are crucial for determining the gradients that are then preserved for back-propagation. While the optimization strategy involves a two-stage process with optimal transport and prompts, the overall training flow remains **end-to-end**.

### 1.3 Analysis of parameters

In terms of the number of parameters in the overall model, our method has more parameters than PLOT because our method has EnLa and learnable visual embeddings. We have added experiments on CLIP-Adapter and PLOT.

### 1.4 Few-shot learning experiments for ViT-B/16 backbones

Our method provides improvements on few-shot settings compared to PLOT. This indicates that our method is more excellent.

### 1.5 Cross Dataset Evaluation for ViT-B/16 backbones

To verify the cross-dataset generalization ability, we train our method on the ImageNet dataset with 1,000 classes, and test it

Table 1: Few-shot learning experiments for ViT-B/16 backbones.

| Dataset      | PLOT  | Ours                            |
|--------------|-------|---------------------------------|
| Average      | 82.09 | <b>83.31</b> ( $\Delta +1.22$ ) |
| ImageNet     | 72.60 | <b>73.35</b>                    |
| Caltech101   | 96.04 | <b>96.37</b>                    |
| OxfordPets   | 93.59 | <b>94.03</b>                    |
| StanfordCars | 84.55 | <b>84.17</b>                    |
| Flowers102   | 97.56 | <b>98.2</b>                     |
| Food101      | 87.11 | <b>87.65</b>                    |
| FGVCAircraft | 46.74 | <b>50.91</b>                    |
| SUN397       | 76.03 | <b>77.20</b>                    |
| DTD          | 71.43 | <b>74.57</b>                    |
| EuroSAT      | 92.00 | <b>93.13</b>                    |
| UCF101       | 85.34 | <b>86.87</b>                    |

Table 2: Cross-dataset benchmark evaluation. Our method achieves overall favorable performance.

|                   | Source       |              | Target       |              |              |              |              |              |              |              |              |              |
|-------------------|--------------|--------------|--------------|--------------|--------------|--------------|--------------|--------------|--------------|--------------|--------------|--------------|
|                   | ImageNet     | Caltech101   | OxfordPets   | StanfordCars | Flowers102   | Food101      | Aircraft     | SUN397       | DTD          | EuroSAT      | UCF101       | Average      |
| Linear probe CLIP | 66.73        | 92.94        | 89.07        | 65.29        | 71.30        | 86.11        | 24.87        | 62.62        | 44.56        | 47.69        | 66.77        | 65.12        |
| CoOp              | <b>71.51</b> | 93.70        | 89.14        | 64.51        | 68.71        | 85.30        | 18.47        | 64.15        | 41.92        | 46.39        | 66.55        | 63.88        |
| CLIP-Adapter      | <b>71.40</b> | 93.85        | 89.57        | 64.66        | 68.85        | 85.54        | 18.53        | 64.35        | 41.86        | 46.43        | 66.77        | 64.04        |
| CoCoOp            | 71.02        | <b>94.43</b> | 90.14        | 65.32        | <b>71.88</b> | 86.06        | 22.94        | 67.36        | 45.73        | 45.37        | 68.21        | 65.74        |
| PLOT              | 70.15        | 94.60        | 90.23        | 65.41        | 71.97        | 86.32        | 22.87        | 67.22        | 44.99        | 46.57        | 68.32        | 65.85        |
| MaPLe             | 70.72        | 93.53        | 90.49        | 65.57        | 72.23        | 86.20        | 24.74        | 67.01        | <b>46.49</b> | 48.06        | 68.69        | 66.30        |
| Ours              | 71.03        | 93.93        | <b>91.20</b> | <b>65.63</b> | 71.73        | <b>86.40</b> | <b>25.13</b> | <b>67.67</b> | 46.47        | <b>48.96</b> | <b>69.73</b> | <b>66.69</b> |

on the remaining 10 datasets. We have added experiments on CLIP-Adapter and PLOT. As shown in Table 2, our method shows competitive performance and achieves better generalization in 8/10 over the PLOT.

### 1.6 Domain Generalization Experiments for ViT-B/16 backbones

We have added experiments on CLIP-Adapter and PLOT. Compared with PLOT, our method shows improved performance in all ImageNet variants datasets.

Table 3: Domain generalization. These approaches are trained on imageNet and tested on datasets with domain shifts.

|                   | Source       | Target      |             |              |              |              |
|-------------------|--------------|-------------|-------------|--------------|--------------|--------------|
|                   | ImageNet     | -V2         | -S          | -A           | -R           | Avg.         |
| Linear probe CLIP | 66.73        | 60.83       | 46.15       | 47.77        | 73.96        | 57.18        |
| CoOp              | <b>71.51</b> | 64.2        | 47.99       | 49.71        | 75.21        | 59.28        |
| CLIP-Adapter      | <b>71.40</b> | 64.5        | 47.72       | 49.75        | 75.55        | 59.38        |
| CoCoOp            | 71.02        | 64.07       | 48.75       | 50.63        | 76.18        | 59.91        |
| PLOT              | 70.15        | 64.17       | 49.15       | 50.83        | 76.5         | 60.16        |
| MaPLe             | 70.72        | 64.07       | 49.15       | 50.9         | 76.98        | 60.27        |
| Ours              | 71.03        | <b>64.3</b> | <b>49.5</b> | <b>51.45</b> | <b>77.83</b> | <b>60.77</b> |

**Table 5: Base-to-novel generalization experiments. Our method demonstrates strong generalization results over existing methods on 11 recognition datasets. Here, the CLIP refers to the linear probe CLIP.**

| Dataset      |       | CLIP  | CoOp  | CLIP-Adapter | CoCoOp | PLOT  | MaPLe        | Ours         | $\Delta$    |
|--------------|-------|-------|-------|--------------|--------|-------|--------------|--------------|-------------|
| Average      | Base  | 69.34 | 82.69 | 82.91        | 80.47  | 81.3  | 82.28        | 84.71        | <b>+2.4</b> |
|              | Novel | 74.22 | 63.22 | 63.98        | 71.69  | 72.2  | 75.14        | 76.90        | <b>+1.8</b> |
|              | HM    | 71.70 | 71.66 | 72.23        | 75.83  | 76.48 | 78.55        | 80.64        | <b>+2.1</b> |
| ImageNet     | Base  | 72.43 | 76.47 | 76.88        | 75.98  | 75.33 | 76.66        | <b>77.70</b> | <b>+1.1</b> |
|              | Novel | 68.14 | 67.88 | 68.1         | 70.43  | 70.48 | 70.54        | <b>70.65</b> | <b>+0.1</b> |
|              | HM    | 70.22 | 71.92 | 72.23        | 73.10  | 72.83 | 73.47        | <b>74.07</b> | <b>+0.6</b> |
| Caltech101   | Base  | 96.84 | 98.00 | 98.1         | 97.96  | 97.86 | 97.74        | <b>98.40</b> | <b>+0.7</b> |
|              | Novel | 94.00 | 89.81 | 90.00        | 93.81  | 93.99 | <b>94.36</b> | 94.07        | <b>-0.3</b> |
|              | HM    | 95.40 | 93.73 | 93.89        | 95.84  | 95.92 | 96.02        | <b>96.2</b>  | <b>+0.2</b> |
| OxfordPets   | Base  | 91.17 | 93.67 | 93.88        | 95.20  | 95.7  | 95.43        | <b>95.67</b> | <b>+0.2</b> |
|              | Novel | 97.26 | 95.29 | 95.55        | 97.69  | 98.1  | <b>97.76</b> | 97.63        | <b>-0.1</b> |
|              | HM    | 94.12 | 94.47 | 94.74        | 96.43  | 96.80 | 96.58        | <b>96.67</b> | <b>+0.1</b> |
| StanfordCars | Base  | 63.37 | 78.12 | 78.35        | 70.49  | 71.5  | 72.94        | <b>78.70</b> | <b>+5.8</b> |
|              | Novel | 74.89 | 60.40 | 60.55        | 73.59  | 73.77 | 74.00        | <b>75.67</b> | <b>+1.6</b> |
|              | HM    | 68.65 | 68.13 | 68.33        | 72.01  | 72.62 | 73.47        | <b>77.22</b> | <b>+3.8</b> |
| Flowers102   | Base  | 72.08 | 97.60 | 97.61        | 94.87  | 95.1  | 95.92        | <b>98.47</b> | <b>+2.5</b> |
|              | Novel | 77.80 | 59.67 | 59.98        | 71.75  | 72.2  | 72.46        | <b>77.00</b> | <b>+4.4</b> |
|              | HM    | 74.83 | 74.06 | 74.32        | 81.71  | 82.10 | 82.56        | <b>86.43</b> | <b>+4.0</b> |
| Food101      | Base  | 90.10 | 88.33 | 88.55        | 90.70  | 90.98 | 90.71        | <b>91.00</b> | <b>+0.3</b> |
|              | Novel | 91.22 | 82.26 | 82.35        | 91.29  | 91.54 | <b>92.05</b> | 91.80        | <b>-0.9</b> |
|              | HM    | 90.66 | 85.19 | 85.36        | 90.99  | 91.28 | 91.38        | <b>91.41</b> | <b>+0.1</b> |
| FGVCAircraft | Base  | 27.19 | 40.44 | 40.66        | 33.41  | 35.6  | 37.44        | <b>43.27</b> | <b>+5.8</b> |
|              | Novel | 36.29 | 22.30 | 23.1         | 23.71  | 28.5  | 35.61        | <b>37.77</b> | <b>+2.0</b> |
|              | HM    | 31.09 | 28.75 | 29.46        | 27.74  | 31.66 | 36.50        | <b>40.34</b> | <b>+3.7</b> |
| SUN397       | Base  | 69.36 | 80.60 | 80.85        | 79.74  | 79.96 | 80.82        | <b>82.77</b> | <b>+2.0</b> |
|              | Novel | 75.35 | 65.89 | 65.91        | 76.86  | 77.33 | 78.70        | <b>79.07</b> | <b>+0.3</b> |
|              | HM    | 72.23 | 72.51 | 72.62        | 78.27  | 78.64 | 79.75        | <b>80.91</b> | <b>+1.2</b> |
| DTD          | Base  | 53.24 | 79.44 | 80.56        | 77.01  | 78.9  | 80.36        | <b>83.87</b> | <b>+3.5</b> |
|              | Novel | 59.90 | 41.18 | 45.30        | 56.00  | 57.9  | 59.18        | <b>63.67</b> | <b>+3.5</b> |
|              | HM    | 56.37 | 54.24 | 58           | 64.85  | 66.8  | 68.16        | <b>72.20</b> | <b>+4.0</b> |
| EuroSAT      | Base  | 56.48 | 92.19 | 92.5         | 87.49  | 90.2  | 94.07        | <b>94.50</b> | <b>+0.5</b> |
|              | Novel | 64.05 | 54.74 | 55.65        | 60.04  | 63.5  | 73.23        | <b>79.60</b> | <b>+6.4</b> |
|              | HM    | 60.03 | 68.69 | 69.49        | 71.21  | 74.54 | 82.35        | <b>86.43</b> | <b>+4</b>   |
| UCF101       | Base  | 70.53 | 84.69 | 84.10        | 82.33  | 82.56 | 83.00        | <b>87.47</b> | <b>+4.5</b> |
|              | Novel | 77.50 | 56.05 | 57.35        | 73.45  | 75.56 | 78.66        | <b>79.17</b> | <b>+0.5</b> |
|              | HM    | 73.85 | 67.46 | 68.21        | 77.64  | 78.92 | 80.77        | <b>83.13</b> | <b>+2.5</b> |

## 1.7 Inference Stage Computational Cost

In Table 4, we show the compute cost analysis of our method and compare it with text embedding learning approaches and hand-craft prompt method CLIP-Adapter. We have added experiments on CLIP-Adapter and PLOT.

**Table 4: The compute cost comparison using SUN397 dataset. Training time for all methods is calculated for 10 epochs on a single A6000 GPU.**

| Method       | Params | Params % CLIP | Train time (min) | HM           |
|--------------|--------|---------------|------------------|--------------|
| CoOp         | 2048   | 0.002         | 10.88            | 71.65        |
| CoCoOp       | 35360  | 0.03          | 39.53            | 75.83        |
| CLIP-Adapter | 0.52M  | 0.41          | 8.55             | 72.23        |
| PLOT         | 8192   | 0.008         | 10.85            | 76.48        |
| MaPLe        | 3.55 M | 2.85          | 10.58            | 79.68        |
| Ours         | 0.65M  | 0.52          | 10.21            | <b>80.51</b> |

## 1.8 Base-to-novel experiments for ViT-B/16 backbones

Our method demonstrates significant improvements on all 11 datasets. Overall, our method provides the best-averaged results of 84.71%, 76.90%, and 80.64% on the base classes, novel classes, and harmonic mean, respectively. We have added experiments on CLIP-Adapter and PLOT.
